# Supplementary material for: DegP Initiates Regulated Processing of Filamentous Hemagglutinin in Bordetella bronchiseptica
Source: PubMed Central journal article supplement (PMC8263021; doi:10.1128/mbio.01465-21), 2021-06-29

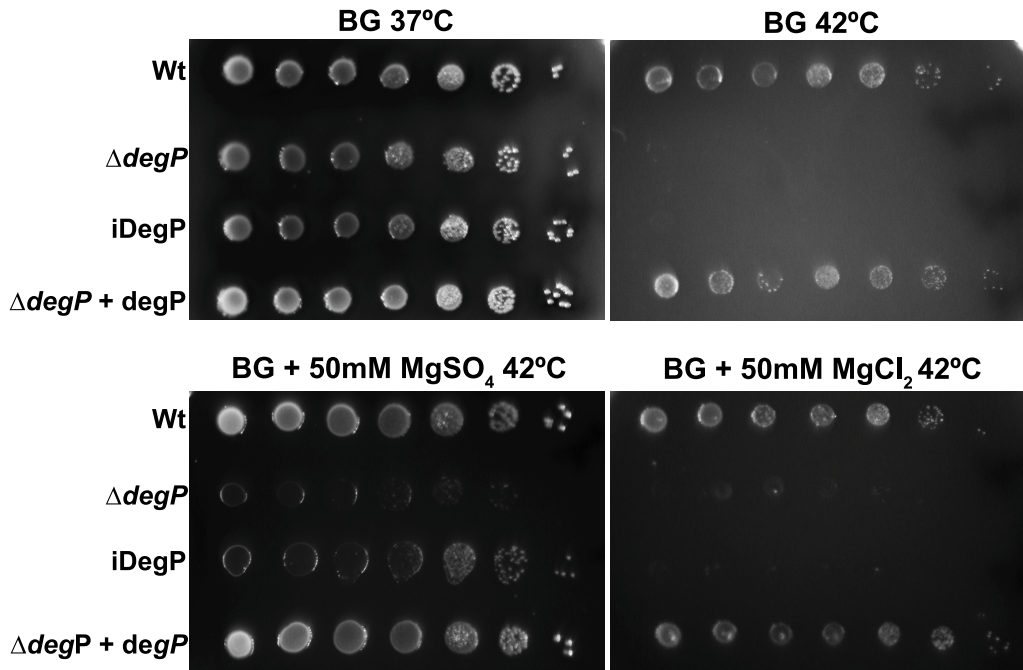

Supplement: mbio.01465-21-sf002.pdf [file mbio.01465-21-sf002.pdf]
