# Supplementary material for: DegP Initiates Regulated Processing of Filamentous Hemagglutinin in Bordetella bronchiseptica
Source: PubMed Central journal article supplement (PMC8263021; doi:10.1128/mbio.01465-21), 2021-06-29

**A****Wild-type**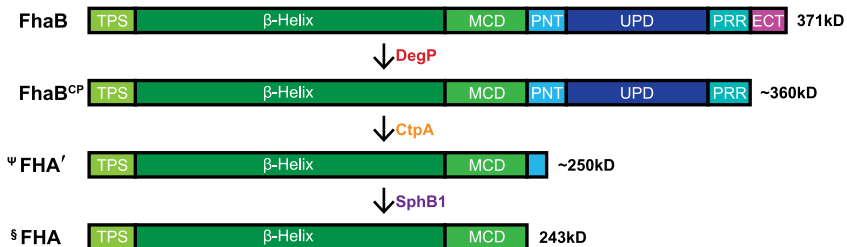**B** **$\Delta$ ctpA**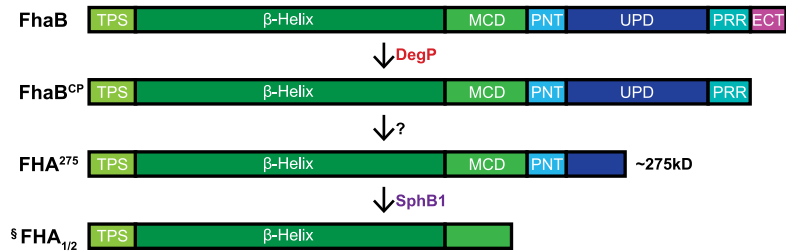**C** **$\Delta$ degP**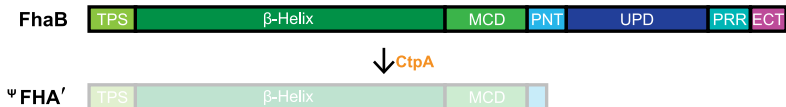**D** **$\Delta$ sphB1**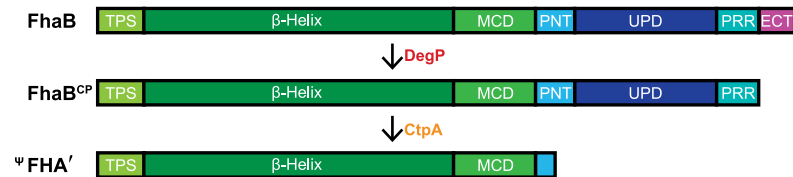**E** **$\Delta$ ctpA  $\Delta$ sphB1**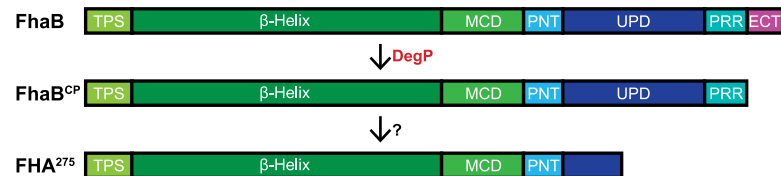**F** **$\Delta$ degP  $\Delta$ ctpA**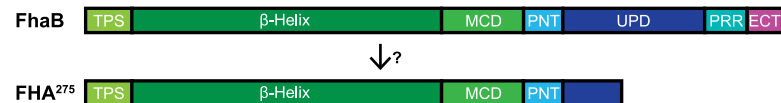**G** **$\Delta$ degP  $\Delta$ sphB1**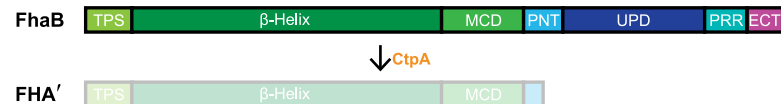

Supplement: mbio.01465-21-sf003.pdf [file mbio.01465-21-sf003.pdf]
